# Supplementary material
Source: PubMed Central journal article supplement (PMC7834223)

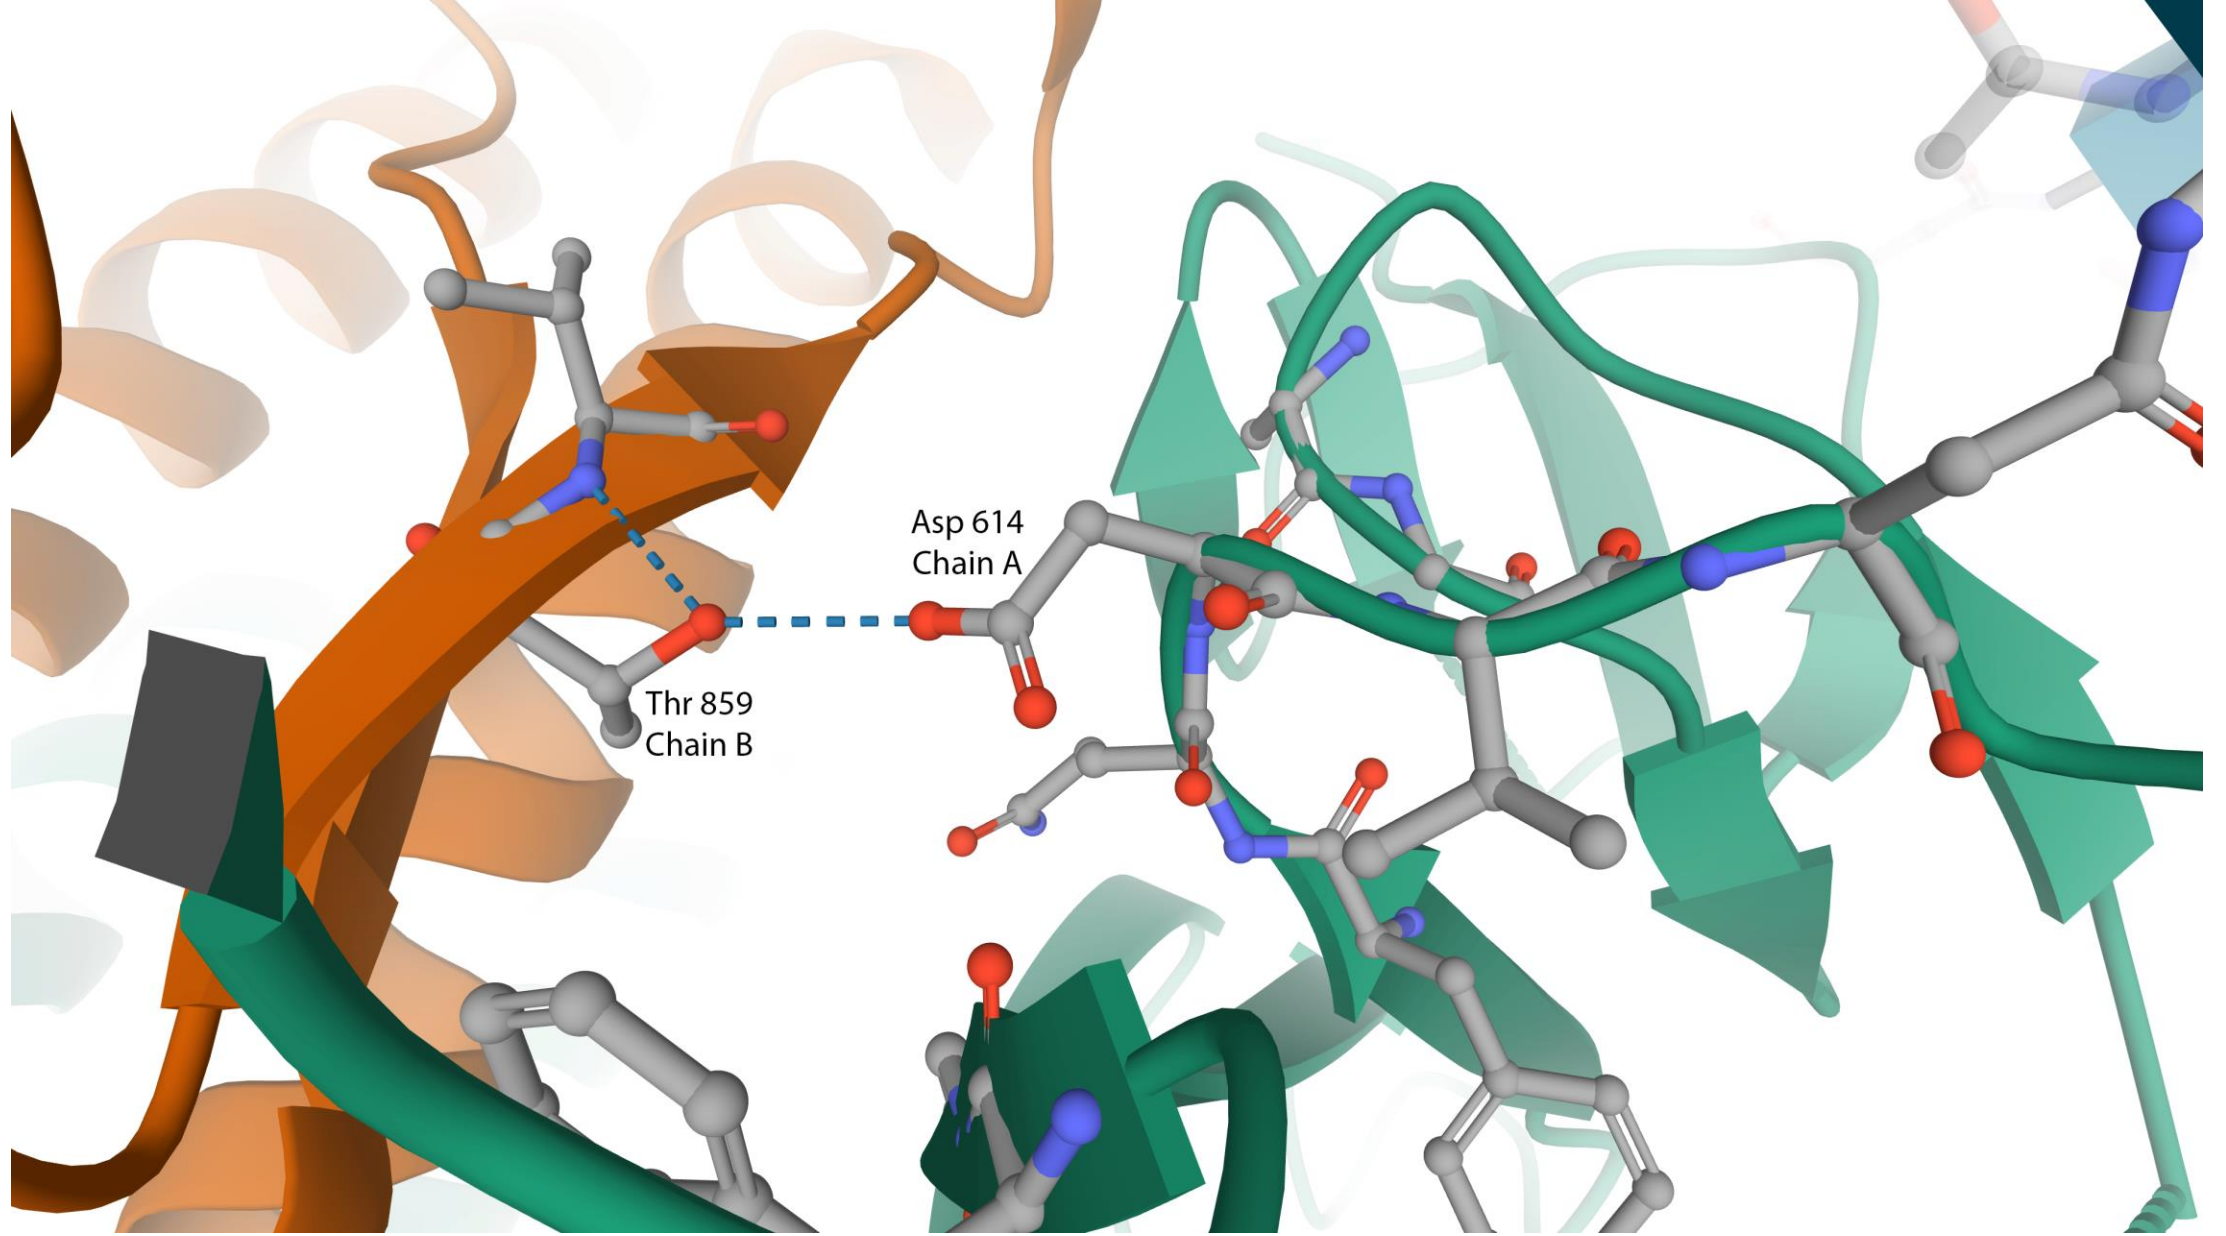

Figure S1 – Protein S Asp614 interactions with Thr859 from the other subunit in the spike trimer (PBD 6VSB).

Supplement: mmc1.pdf [file mmc1.pdf]
